# Supplementary material for: Gamma irradiation effects on physical and electronic properties of monolayer CVD grown graphene
Source: Royal Society of Chemistry journal article supplement (doi:10.1039/d5na00162e), 2025-01-01
Supplement: d5na00162e1.pdf [file d5na00162e1.pdf]

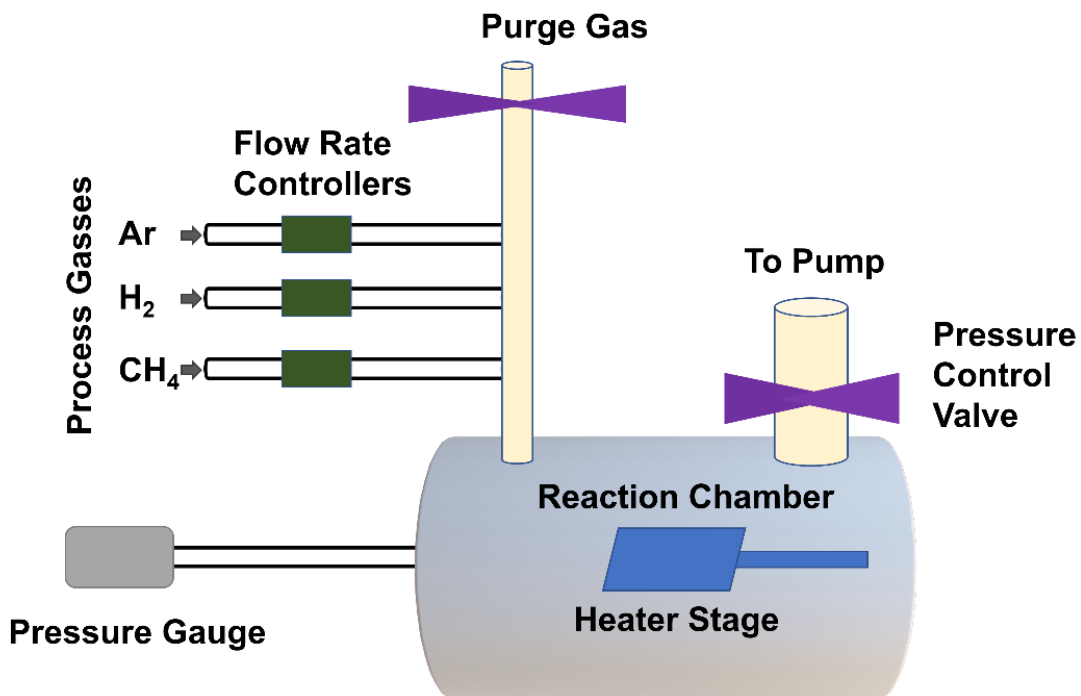

**Figure S1:** Schematic of gas flow in the graphene nanoCVD reactor.

**Table. S1** Electronic properties of pristine and defected monolayer graphene (MLG).

| Data of Band Structure and Density of States | Pristine monolayer graphene | 1 point defect in graphene | 2 point defects in graphene | C-O-C bond with defect in graphene | C-OH bond with defect in graphene | -COOH bond with defect in graphene |
|----------------------------------------------|-----------------------------|----------------------------|-----------------------------|------------------------------------|-----------------------------------|------------------------------------|
| $E_f$ (Fermi Energy) (eV)                    | 0.9014                      | 0.6151                     | 0.3890                      | 0.7095                             | 0.7695                            | 1.0334                             |
| $E_g$ (Bandgap Energy) (eV)                  | 0.00                        | 0.2778                     | 0.6119                      | 0.8105                             | 0.9527                            | 0.2361                             |
